# Supplementary material
Source: PubMed Central journal article supplement (PMC1635350)

A

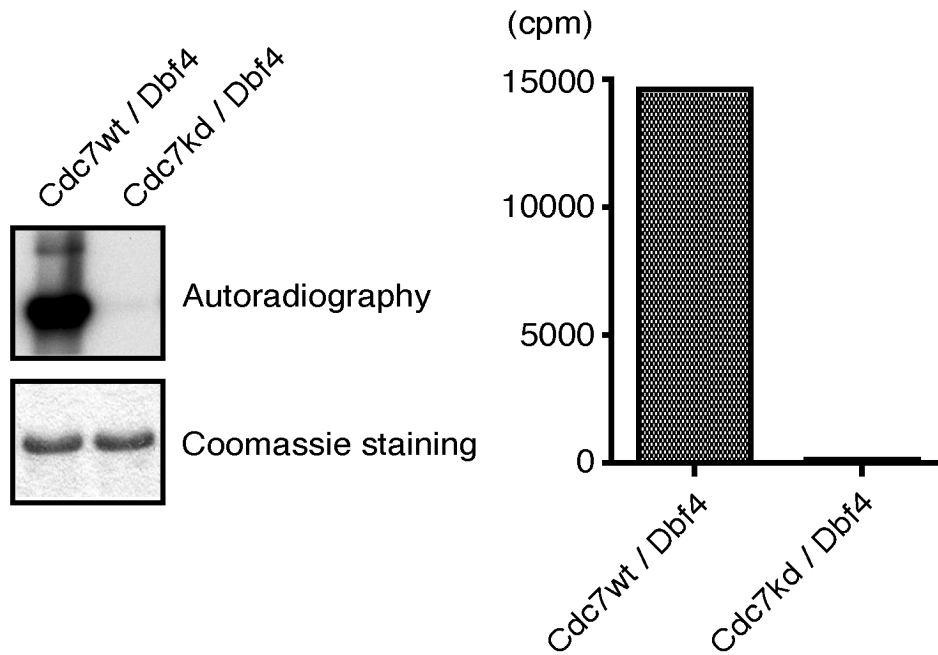

B Human MCM2

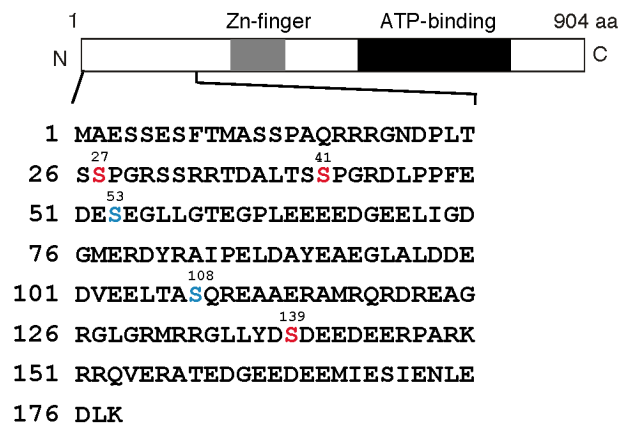

Supplement: mbc_E06-03-0241_1.pdf [file mbc_E06-03-0241_1.pdf]

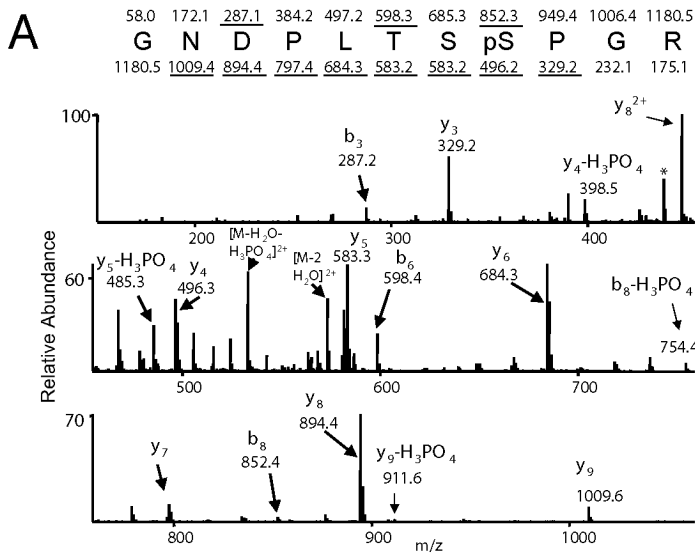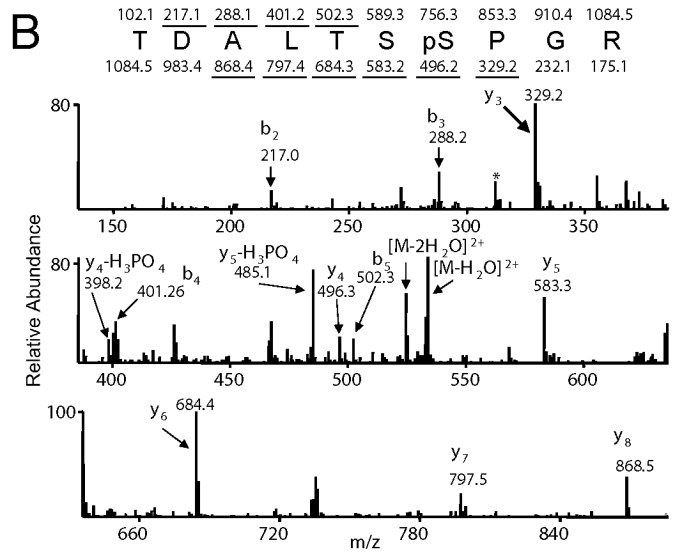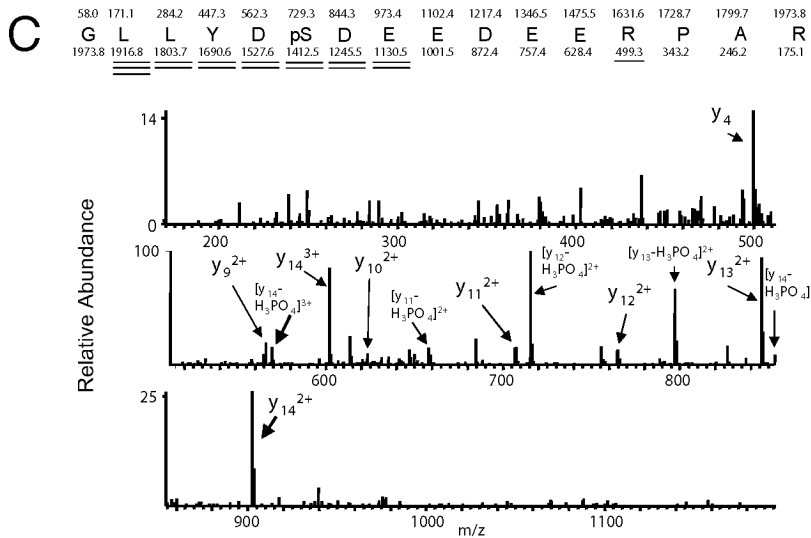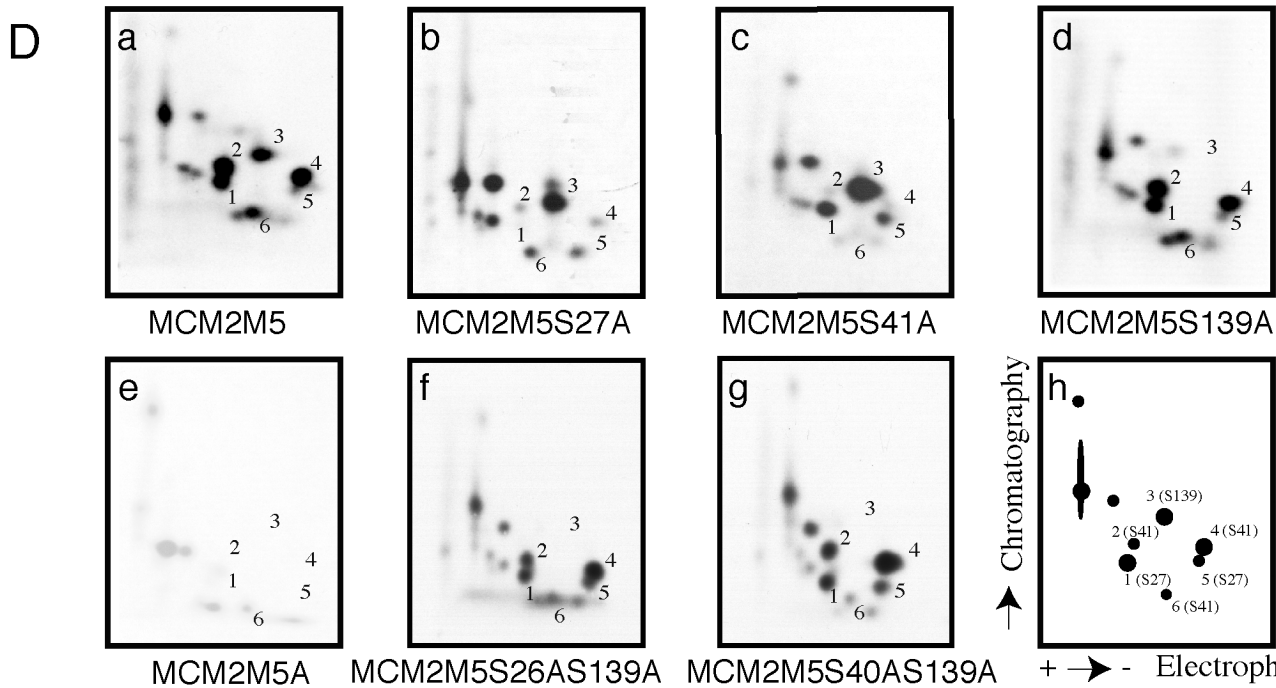

Figure S2 Tsuji *et al*

Supplement: mbc_E06-03-0241_2.pdf [file mbc_E06-03-0241_2.pdf]

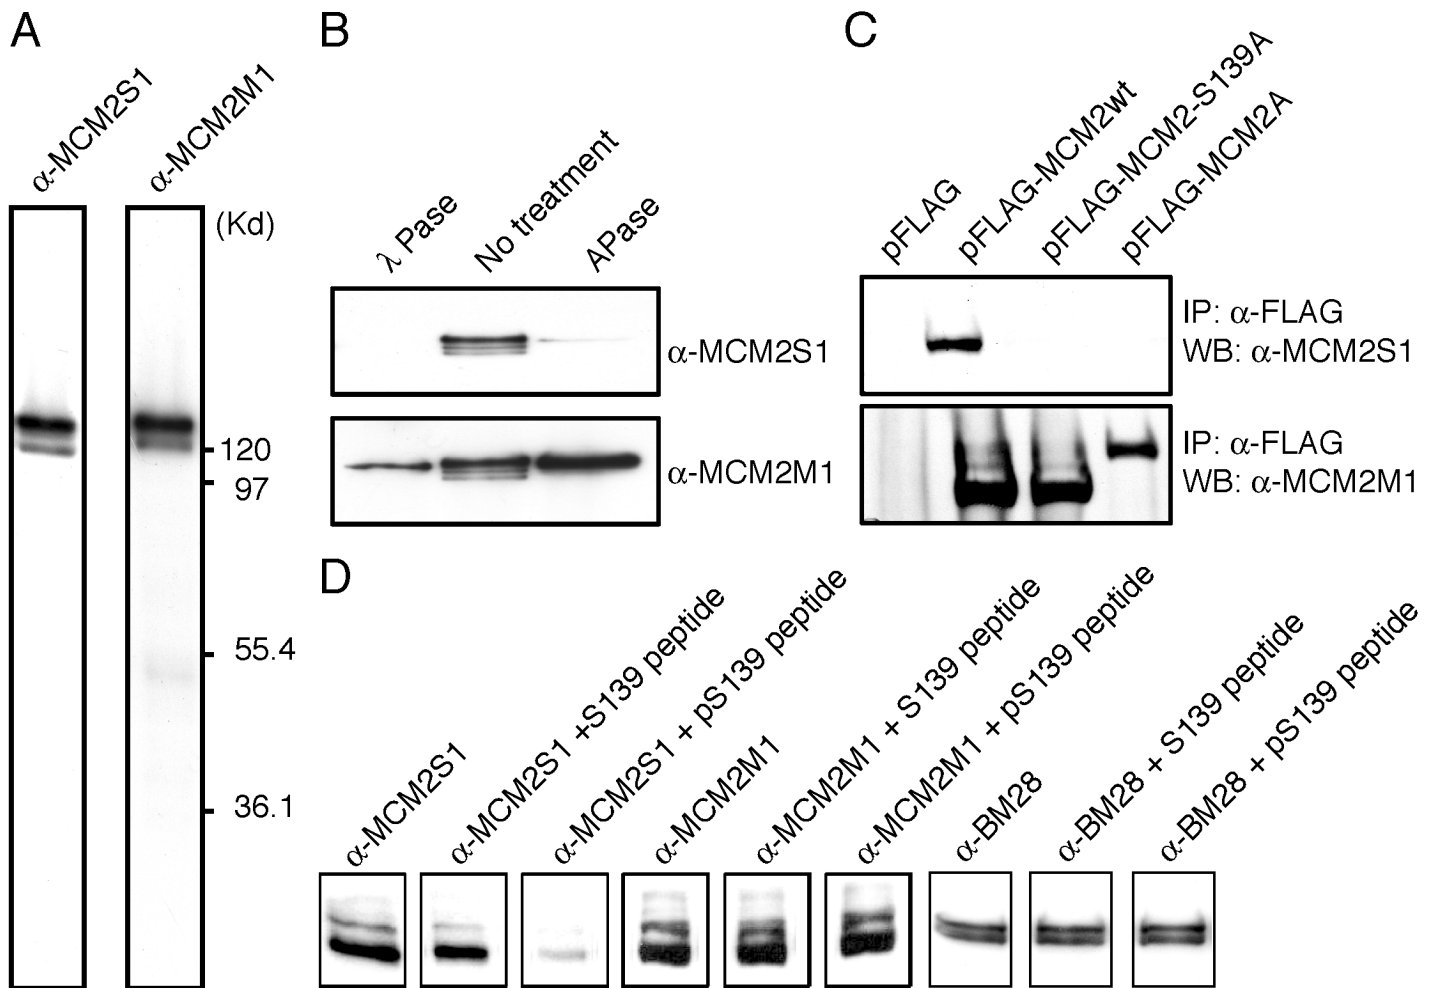

Figure S3 Tsuji *et al*

Supplement: mbc_E06-03-0241_3.pdf [file mbc_E06-03-0241_3.pdf]

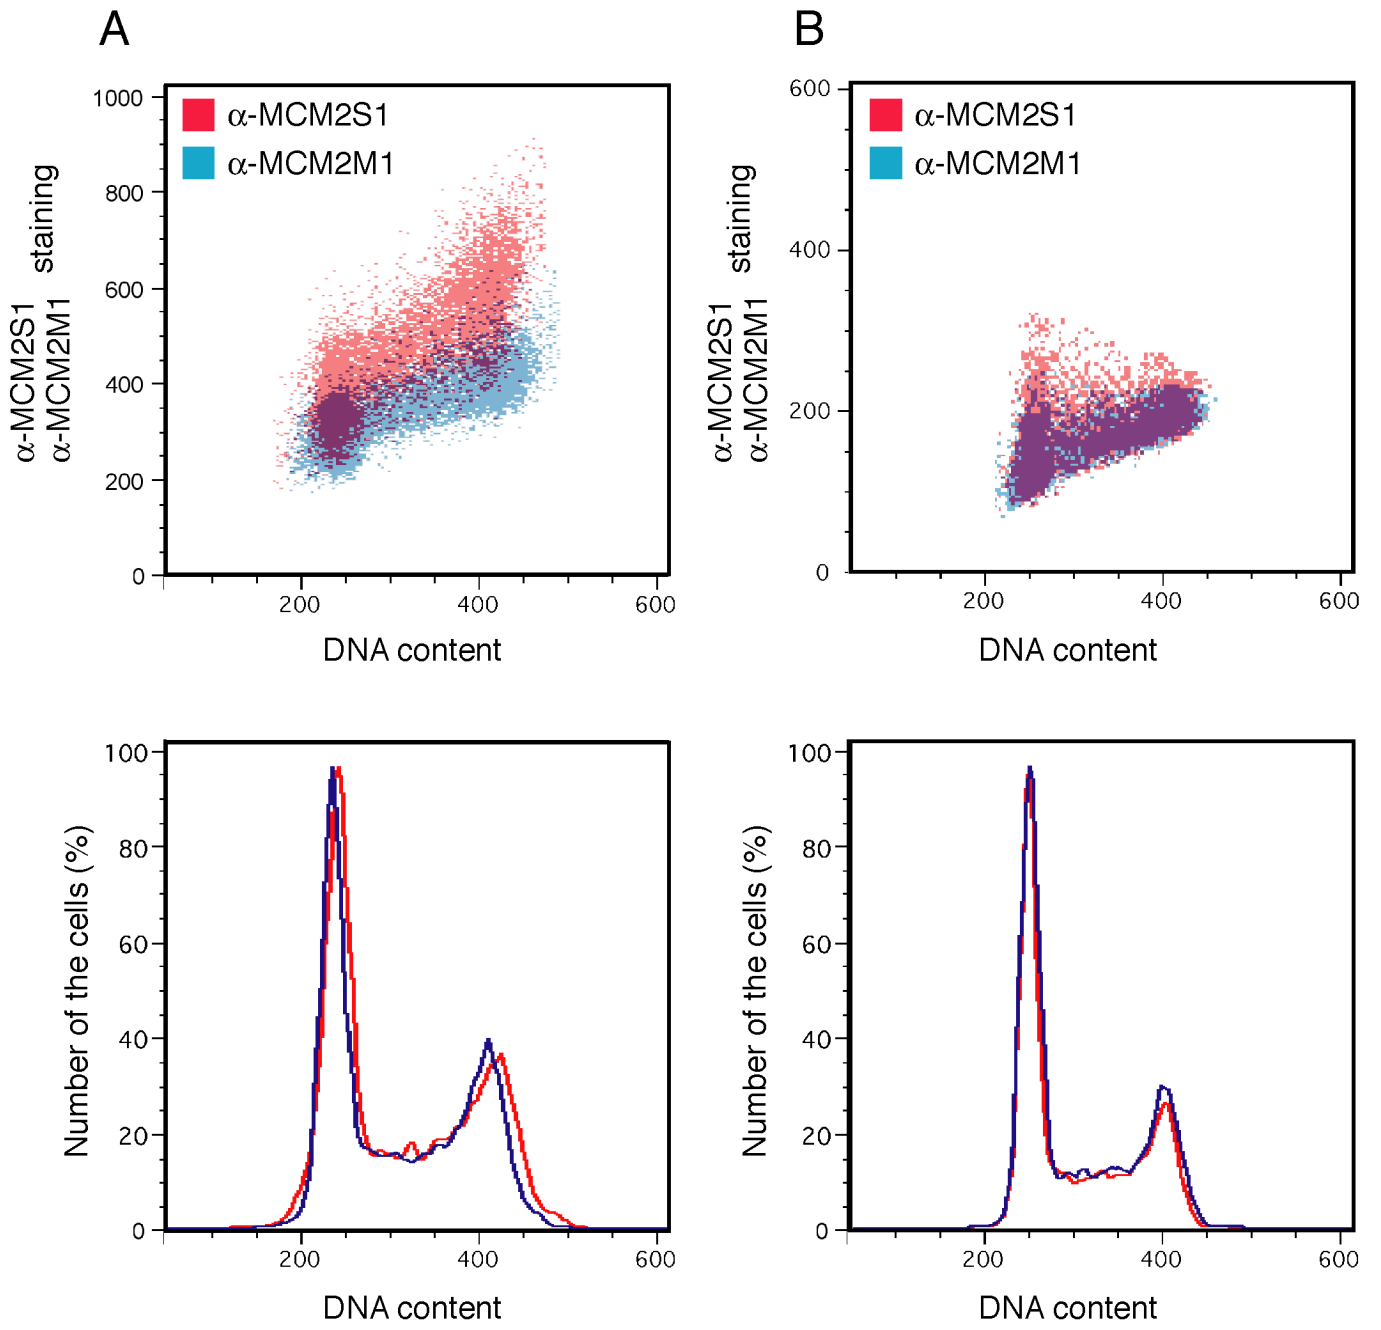

Figure S4 Tsuji *et al*

Supplement: mbc_E06-03-0241_4.pdf [file mbc_E06-03-0241_4.pdf]

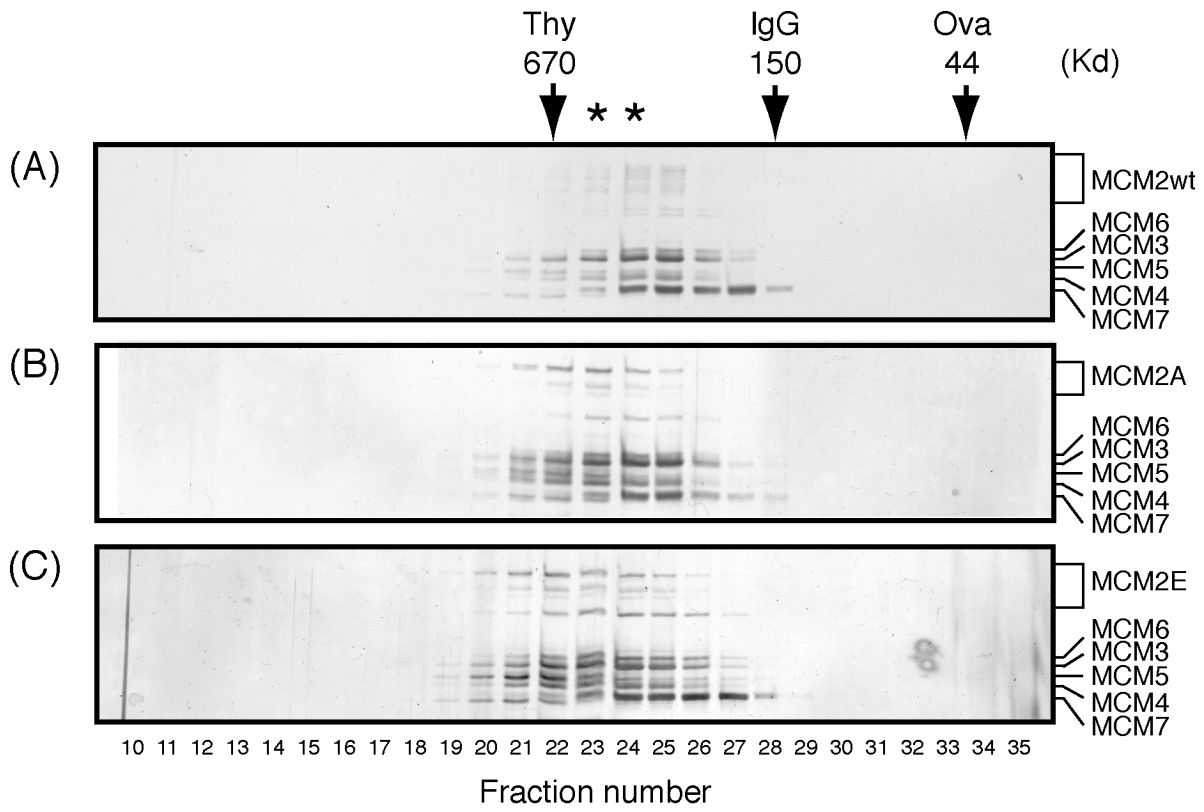

Figure S5 Tsuji *et al*

Supplement: mbc_E06-03-0241_5.pdf [file mbc_E06-03-0241_5.pdf]
